# Supplementary material for: N2O5reactive uptake kinetics and chlorine activation on authentic biomass-burning aerosol
Source: Royal Society of Chemistry journal article supplement (doi:10.1039/c9em00330d), 2019-01-01

## Supplemental Information for

### **N<sub>2</sub>O<sub>5</sub> Reactive Uptake Kinetics and Chlorine Activation on Authentic Biomass-Burning Aerosol**

Lexie Goldberger<sup>1,†</sup>, Lydia G. Jahl<sup>2</sup>, Joel A. Thornton<sup>1,\*</sup>, and Ryan C. Sullivan<sup>2,\*</sup>

<sup>1</sup>Department of Atmospheric Science, University of Washington, Seattle, WA, USA

<sup>2</sup>Center for Atmospheric Particle Studies, Carnegie Mellon University, Pittsburgh, PA, USA

<sup>†</sup>Now at: Pacific Northwest National Laboratories, Richland, WA, USA

\*Corresponding Authors: Joel Thornton ([thornton@atmos.washington.edu](mailto:thornton@atmos.washington.edu)); Ryan C. Sullivan ([rsullivan@cmu.edu](mailto:rsullivan@cmu.edu))

Below are the typical aerosol surface area distributions measured in the flow reactor during the experiments for each of the fuel types.

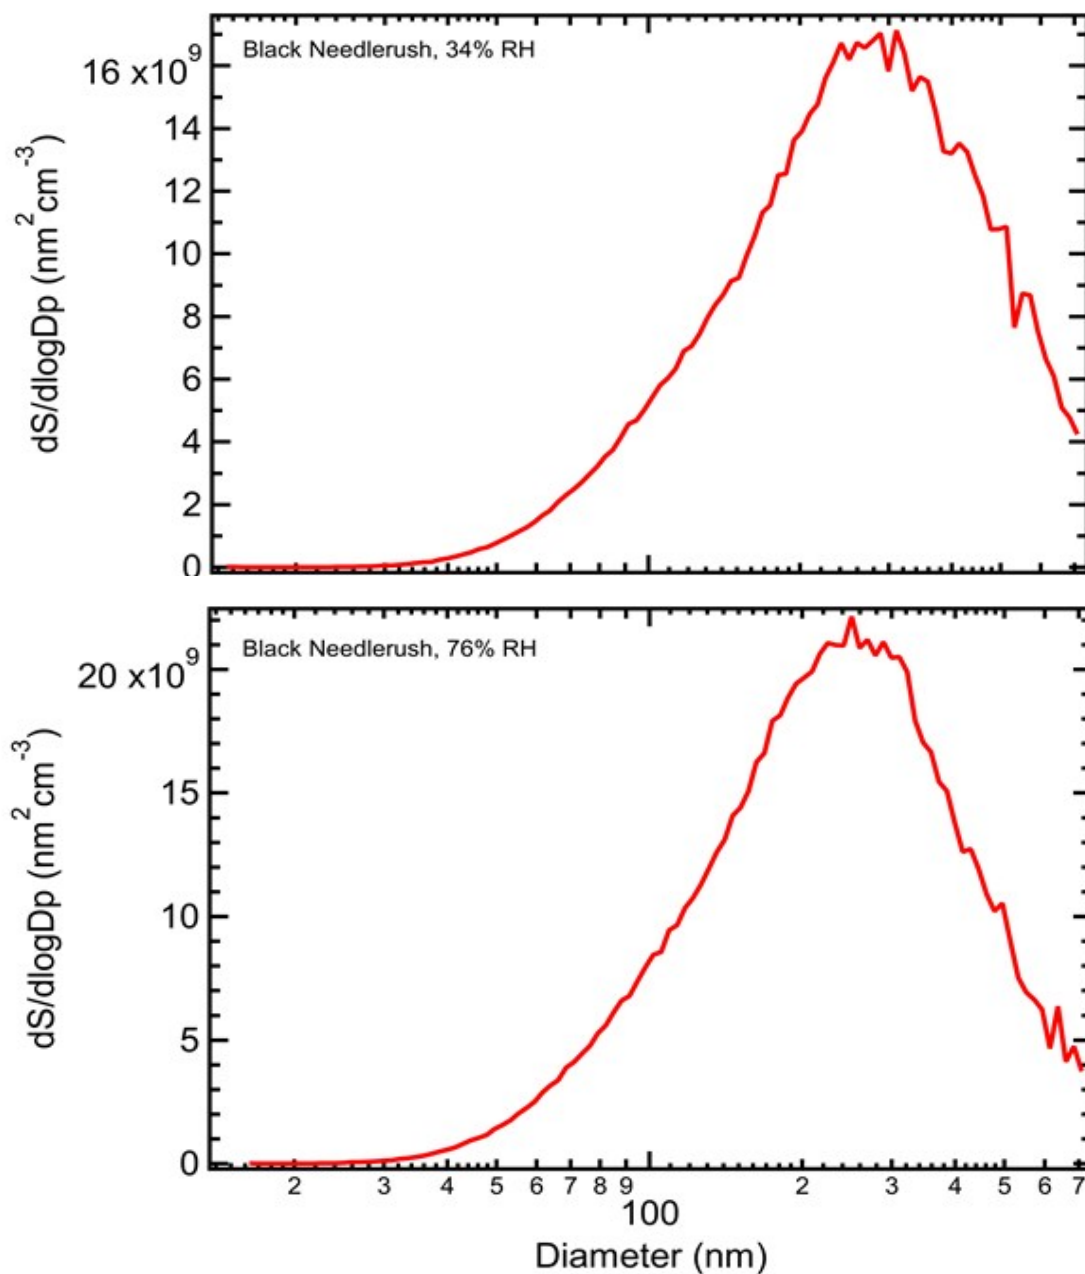

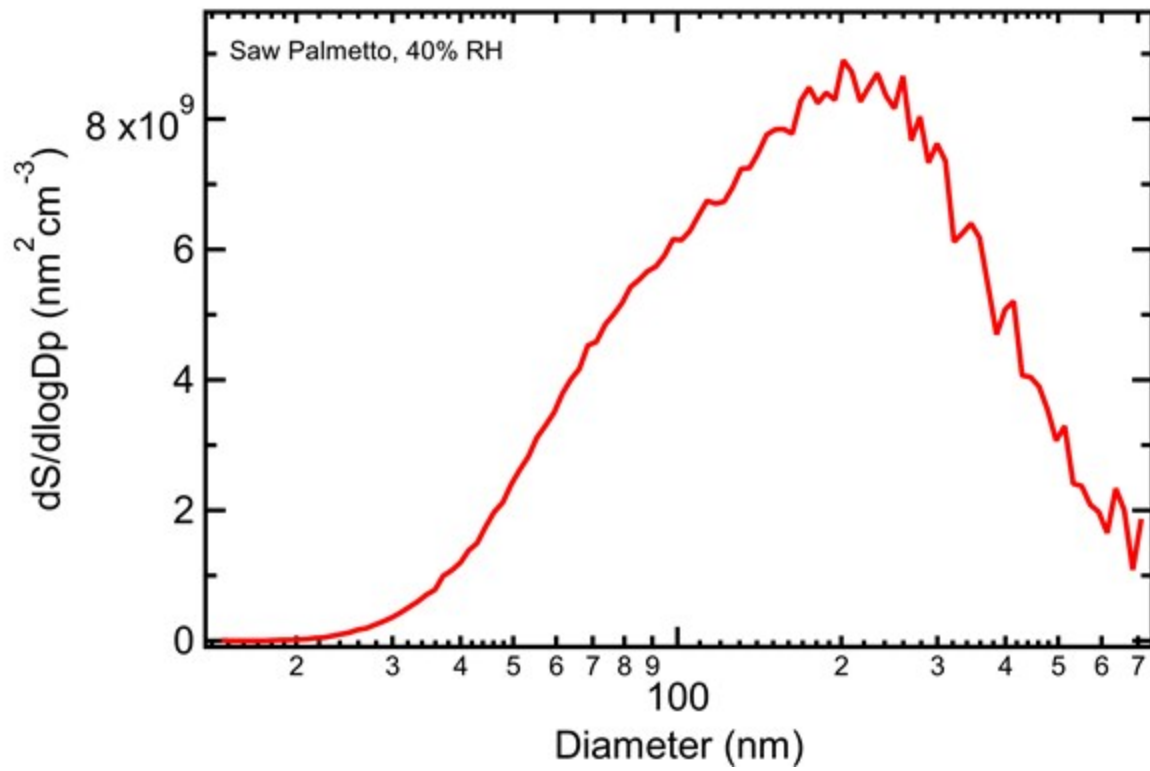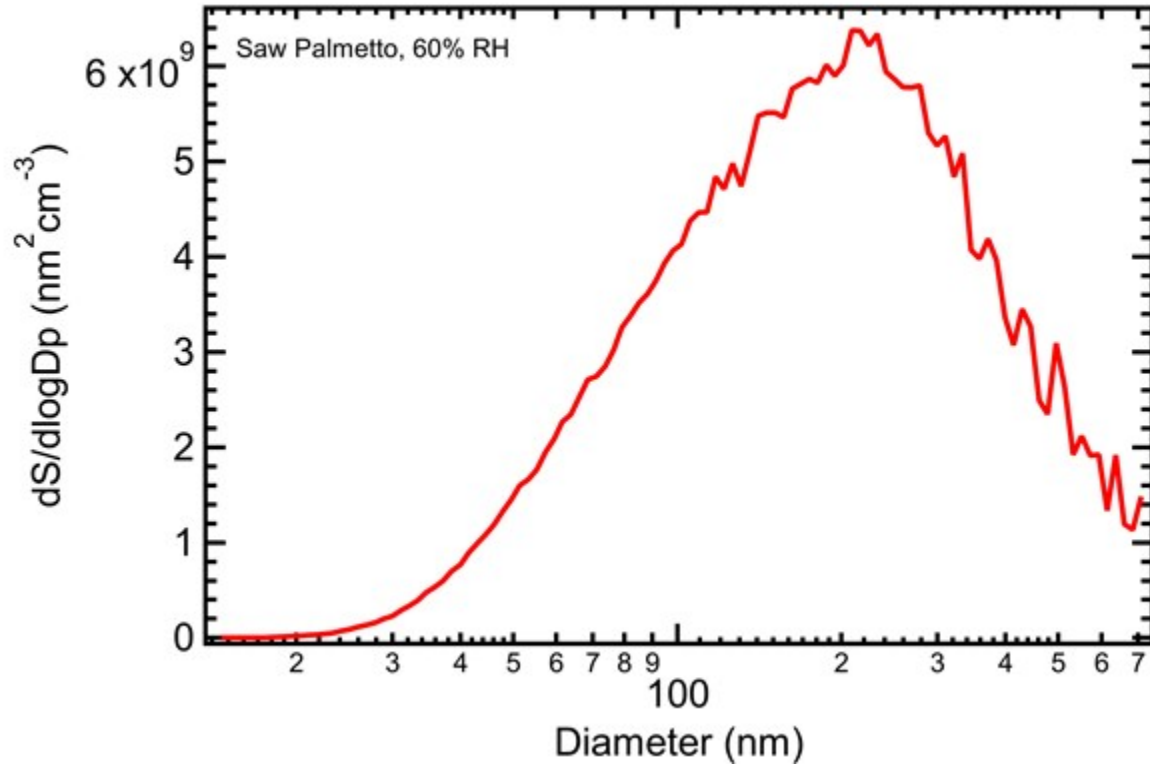

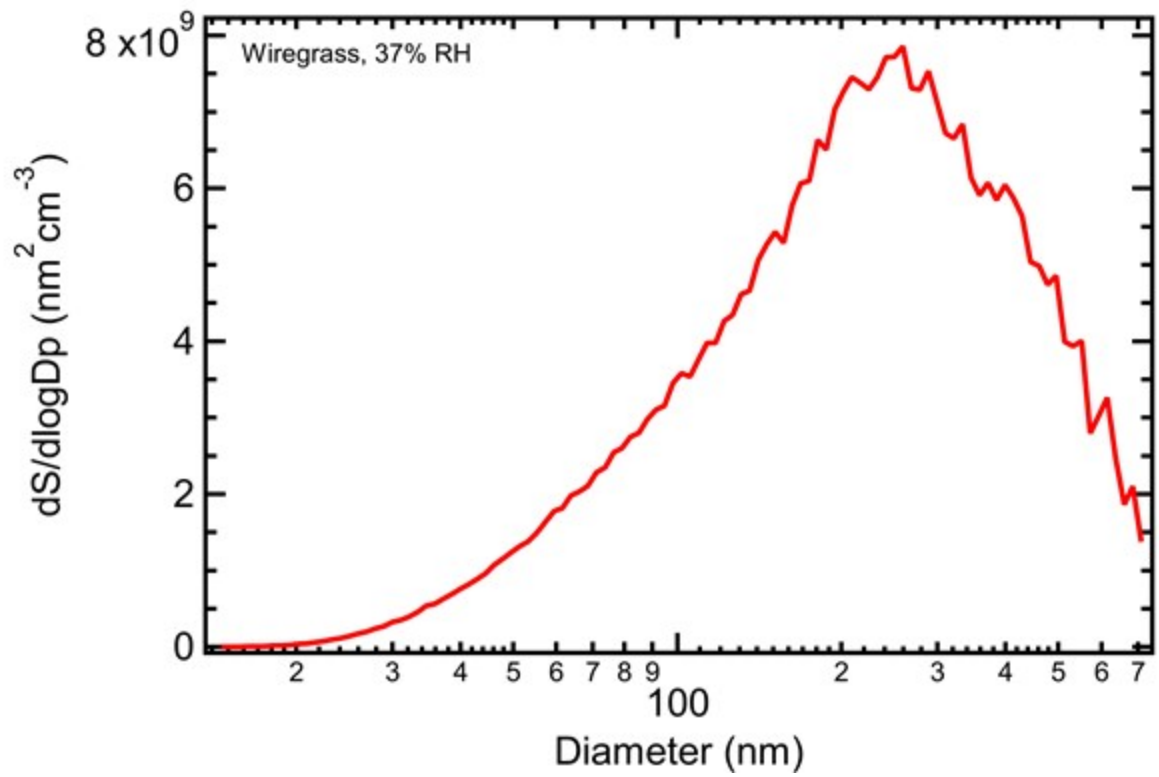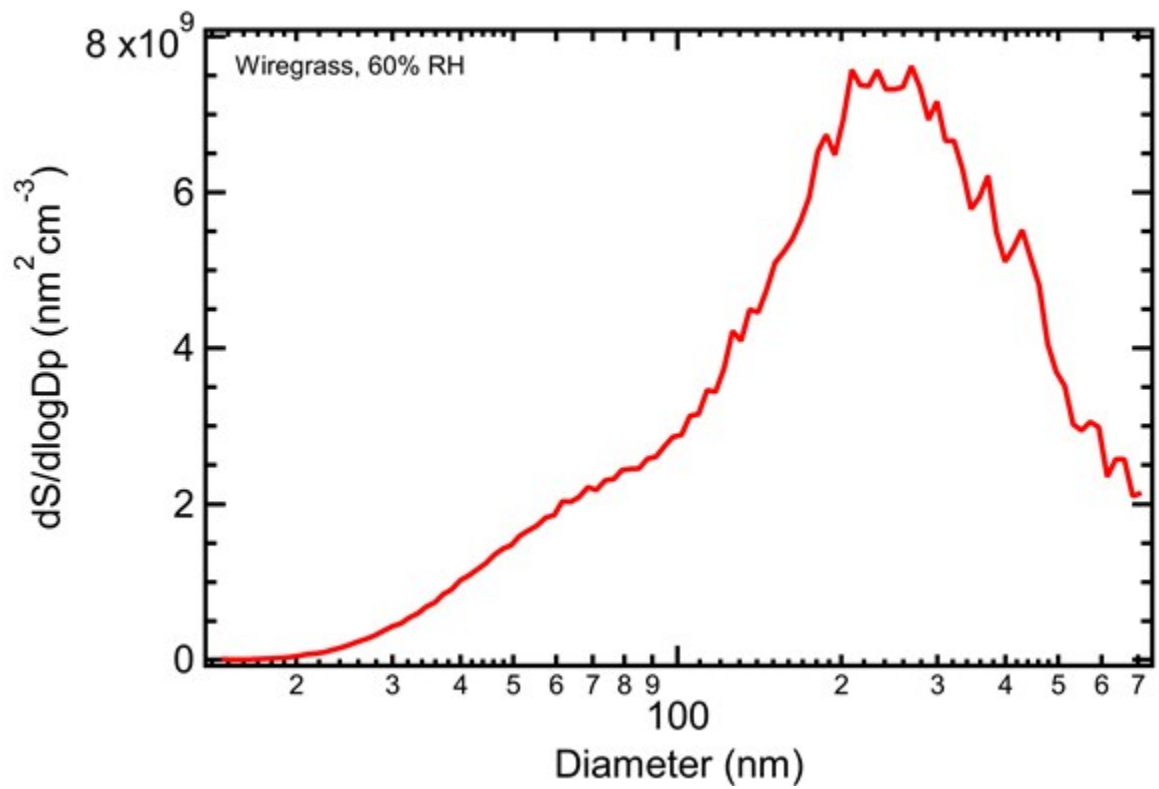

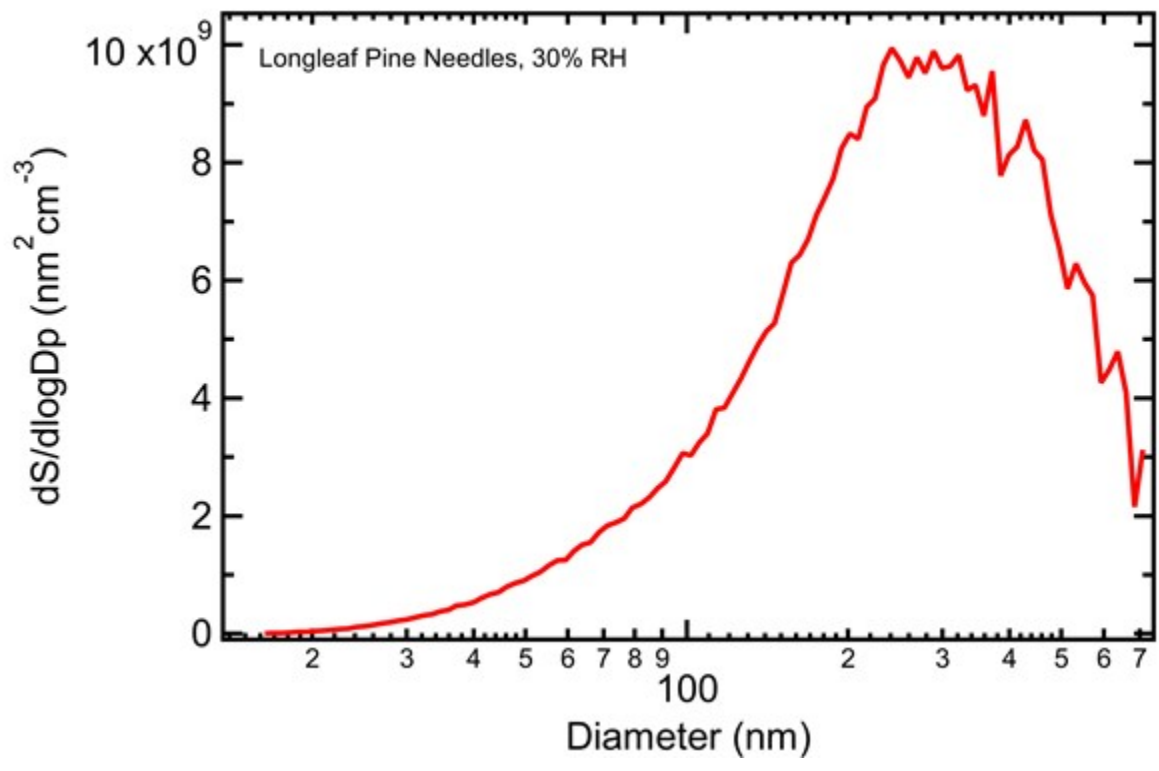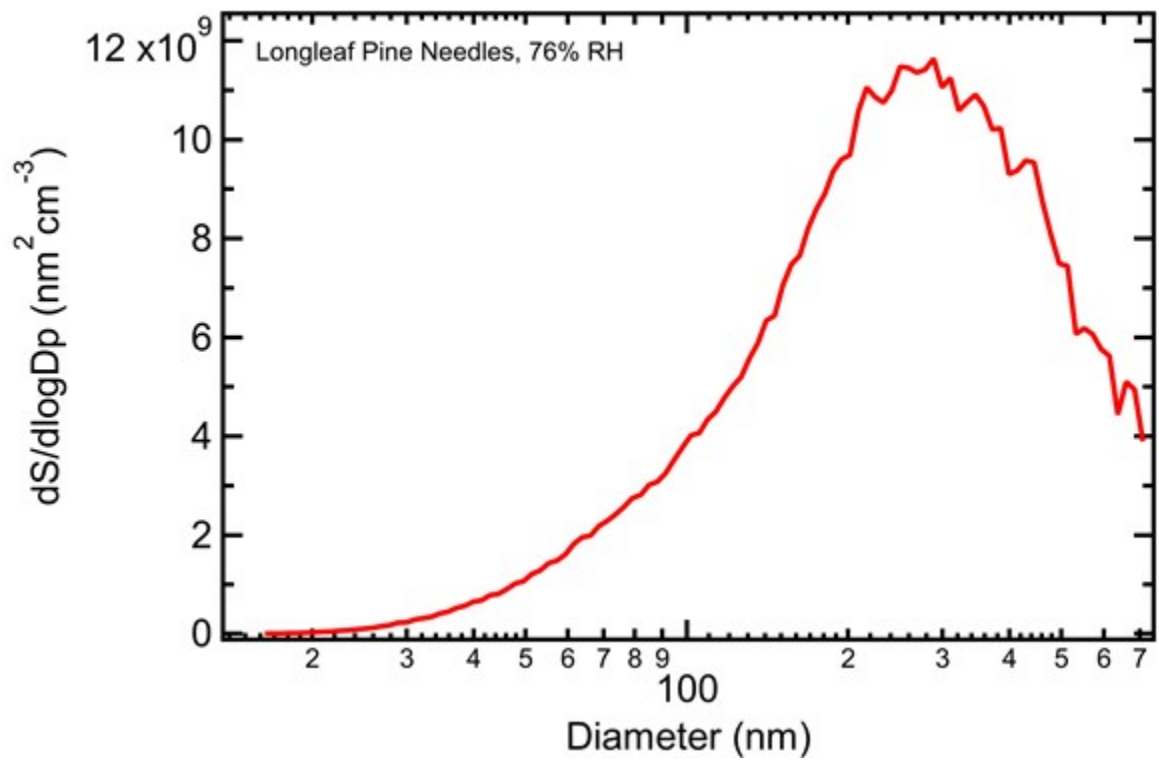

Supplement: c9em00330d1.pdf [file c9em00330d1.pdf]
